**Title:** Rapid evolution of learning and reproduction in natural populations of *Drosophila melanogaster*

**Authors:** Emily L. Behrman<sup>1,2,3</sup>, Tadeusz J. Kawecki<sup>2\*</sup> and Paul Schmidt<sup>1\*</sup>

**Author Affiliations:**

1. Department of Biology, University of Pennsylvania, 433 S. University Ave. Philadelphia, PA 19104

2. Department of Ecology and Evolution, University of Lausanne, Biophore, CH-1015 Lausanne, Switzerland

3. Current address: Janelia Research Campus, Howard Hughes Medical Institute, 19700 Helix Drive Ashburn, VA 20147

\* Authors contributed equally

**Orcid IDs:**

Emily Behrman: 0000-0002-2472-9635

Tadeusz Kawecki: 0000-0002-9244-1991

Paul Schmidt: 0000-0002-8076-6705

**Running head:** Rapid evolution of learning

**Corresponding Author:**

Emily L. Behrman

Email Address: Bemily@sas.upenn.edu

Mailing address: 19700 Helix Drive

Ashburn, VA 20147

Phone: 571.209.4000

**Keywords**

Rapid adaptation, learning, fecundity, trade-offs, *Drosophila melanogaster*, couch potato

## Abstract

Learning is a general mechanism of adaptive behavioural plasticity whose benefits and costs depend on the environment. Thus, seasonal oscillations in temperate environments between winter and summer might produce cyclical selection pressures that would drive rapid evolution of learning performance in multivoltine populations. To test this hypothesis, we investigated the evolutionary dynamics of learning ability over this rapid seasonal timescale in a natural population of *Drosophila melanogaster*. Associative learning was tested in common garden-raised flies collected from nature in the spring and fall over three consecutive years. The spring flies consistently learned better than fall flies, revealing seasonal evolution of improved learning performance in nature. Fecundity showed the opposite seasonal pattern, suggesting a trade-off between learning and reproduction. This trade-off also held within population: more fecund individual females learned less well. This trade-off is mediated at least in part by natural polymorphism in the RNA binding protein *couch potato* (*cpo*), with a genotype favoured during summer showing poorer learning performance and higher fecundity than a genotype favoured over winter. Thus, seasonal environments can drive rapid cyclical evolution of learning performance, but the evolutionary dynamics may be driven by trade-offs generated by pleiotropic effects of causative alleles selected for other reasons.

# 1. Introduction

Learning is a powerful mechanism of plasticity that allows animals to behaviourally respond to changing environments without genetically-based evolutionary change [1,2]. Learning plays an important role in many aspects of animal biology including foraging, spatial orientation, predator avoidance, aggression, social interactions, and sexual behaviour [1,3–7], and thus is likely to have manifold effects on fitness.

The ability to learn is itself a product of evolution, but we know very little about how rapidly characteristics of the learning process evolve in nature. Examples of genetic differences in learning performance have been reported between closely related species [8,9] and between allopatric populations within a species [10,11], but the timescale over which these differences have evolved is unknown. Laboratory selection experiments in a range of taxa indicate that natural populations have copious standing genetic variation for learning ability and that learning performance can improve rapidly under direct selection [12–16]. However, selection on learning in nature may be indirect and mediated by the fitness consequences of the many behaviours it modifies. An environmental change that results in an increased advantage of learning in the context of one behaviour (e.g., foraging) might have no effect on, or even decrease, its benefits in a different context (e.g., predator avoidance), thus dampening net selection on learning.

Here we test if learning performance evolves rapidly over an annual timescale in a natural population of *D. melanogaster*. This multivoltine species is a promising system to study rapid evolution because each generation experiences different conditions as seasons progress. The alternating conditions between different selection regimes of winter and summer drive rapid cyclical evolution of *Drosophila melanogaster* life history, stress resistance and immunity traits [17–19]. One might predict that increased ability to learn should be favoured in the summer

## Rapid evolution of learning

because learning modulates behaviours that are key to fitness in the summer, such as foraging, pathogen avoidance, and sexual and social interactions [20–25]. However, learning might also contribute to behaviours that are important for overwintering survival (e.g., shelter identification, foraging, pathogen avoidance). Finally, evolutionary dynamics of learning ability may be driven by selection on genetically correlated traits. Such genetic correlations may reflect the high energetic costs of the central nervous system [26,27], leading to trade-offs with other fitness traits. Such trade-offs have been reported between learning and reproduction in *Pieris rapae* [28] and *Drosophila* [29], as well as between learning and stress resistance in *Drosophila* [30,31]. Thus, seasonal evolution in learning ability could be driven by indirect effects of selection on correlated traits – particularly on fecundity in the summer or stress tolerance in the winter.

We assessed aversive and appetitive learning in common-garden-raised flies derived from spring and fall collections made at the same locality in the wild over three consecutive years. We found that learning performance was consistently higher in the post-winter (i.e., spring) collections compared to the post-summer collections in the fall. A reproductive cost of learning ability was indicated by an inverse relationship with fecundity between seasonal populations and at an individual level.

Next, we tested if natural variants of the pleiotropic RNA-binding protein *couch potato* (*cpo*) contribute to the relationship between learning and fecundity. Fecundity and reproductive dormancy differ among natural variants in *cpo* that change in frequency with latitude and season [32–35]. We hypothesized that *cpo* may be involved in learning because it is highly expressed in the nervous system including the centre of associative learning, the mushroom body [36–38]. We found that learning performance and fecundity in flies carrying natural *cpo* genotypes that are more common in spring versus fall paralleled the seasonal differences in learning within the

natural population. These results suggest that rapid fluctuating evolution of learning ability in wild *Drosophila* is at least in part driven by pleiotropic effects of *cpo* polymorphism.

## 2. Methods

### (a) Seasonal populations derived from nature

The evolution of learning differences over seasonal time was assessed by comparing seasonal reconstructed outbred populations (ROP) from isofemale lines, hereafter referred to as spring and fall ROPs. Gravid females aspirated off decaying fruit in the spring (June) and fall (November) at Linvilla Orchards in Media, PA (39.9°N, 75.4°W), across three consecutive years (2012-2014) were used to establish isofemale lines that were maintained in standard laboratory conditions (25°C, 12L:12D on cornmeal-molasses medium) on a four-week transfer cycle. Populations representing each collection were constructed after all collections were complete using 40 isofemale lines per collection. The populations were subsequently maintained in common garden culture for more than 10 non-overlapping generations. Systematic differences in traits between spring and fall ROPs assessed in the common garden can be attributed to genetic differences of the spring and fall allele frequencies.

### (b) *cpo* recombinant outbred populations

Three intronic SNPs in *cpo* are associated with climatic adaptation: 3R:17964408, 3R:17965558, 3R:17967866 (*D. melanogaster* reference genome v.6). The temperate genotype (*cpo*<sup>TTA</sup>) is more common at high latitudes and in the spring while the tropical genotype (*cpo*<sup>CGT</sup>) is more common at low latitudes and in the fall [35]. The polymorphism at 3R:17967866 was

identified as a non-synonymous coding change in exon 5 with functional effects on reproductive dormancy and other life history traits [33,37], however, its specific molecular function has been re-evaluated as it not identified in the modENCODE classification of functional elements [39]. Learning performance of the genotypes was assessed using ROPs that were each fixed for one genotype with a randomized genetic background [40]. ROPs for *cpo*<sup>TTA</sup> and *cpo*<sup>CGT</sup> were constructed using nine independent, homozygous lines from the *Drosophila* Genetics Reference Panel [35,41]. Ten gravid females from each line were permitted to lay eggs for 48h; after at least 10 non-overlapping generations of recombination with the other lines containing the same genotype each ROP was fixed for either *cpo*<sup>TTA</sup> or *cpo*<sup>CGT</sup>, and any linked loci, in a heterogeneous, outbred background.

### (c) Aversive shock learning in the laboratory

We quantified the performance of flies in an aversive olfactory learning assay that assessed their ability to remember and avoid an odour previously associated with mechanical shock [30]. Flies were reared in common laboratory conditions (25°C, 12L:12D) at standardized density of 100 eggs per vial, sorted into groups by sex under light CO<sub>2</sub> anaesthesia 24 hour prior to the learning assessment, and then assayed at 3-5 days of age. Single-sex groups of 30 flies were conditioned to associate an odorant (the conditioned stimulus, CS+) with a mechanical shock. Three cycles of conditioning were conducted, each consisting of the sequence: 30 seconds exposure to CS+ paired with mechanical shock (pulsating 1 second every 5 seconds), 60 seconds break of humid air, 30 seconds exposure to another odorant (CS-) with no shock, and 60 seconds humid air. Methylcyclohexanol (MCH, 800 uL/L) and 3-octanol (OCT, 600 uL/L) were used as odorants; half of the fly groups were conditioned to avoid each odorant to account for innate

preference for either odorant (defining two conditioning directions). After a one-hour memory retention interval we tested odorant preference of the conditioned flies by giving them 60 seconds to choose between the odorants in an elevator T-maze. The *cpo* genotypes were also assessed for immediate response (5-minute retention) and long-term memory (24-hour retention).

To exclude impairment in odour perception or differences in innate preference we performed two additional controls. Controls for absolute preference subjected flies to mechanical shock cycle without odorant before presenting a choice between a single odorant and air in the T-maze. Controls for relative preference tested innate odour preference in naïve flies by giving a choice between the two odorants in the T-maze.

All statistical analyses were performed using the R software (R Core Team, version R 3.2.2). To analyse learning performance, we modelled proportion of flies selecting the odour not previously associated with shock (CS−) using generalized mixed models with logit link and binomial error distribution, fitted by maximum likelihood (package *lme4*, Bates et al. 2014). To test for the significance of main effects and interactions, we used likelihood ratio test from the package *afex* [43] and functional analysis of variance (ANOVA, Fox and Weisberg 2011). Flies that chose no odour (i.e., remained in the centre of the T-maze) were excluded from analysis. For illustration purposes, the proportion of flies learning was rescaled as  $2 \times \text{proportion} - 1$  to make it range from −1 to 1 with 0 indicating no learning. We used the following models where ROP (season or *cpo* genotype), year, sex, and conditioning treatment are fixed effects and block is a random effect grouping samples tested at the same time:

Natural populations:

## Rapid evolution of learning

164 *Proportion = Year + ROP + Sex + Conditioning treatment + Year:Conditioning treatment +*  
 165 *Sex:Conditioning treatment + Block*

166

167 *cpo* genotypes:

168

169 *Proportion = ROP + Sex + Conditioning treatment + Retention Interval + ROP:Conditioning*  
 170 *treatment + ROP:Retention Interval + Block*

171

172 *(d) Appetitive learning in a natural environment*

173 The appetitive conditioning learning assays tested the flies' ability to remember and  
 174 prefer the flavour previously associated with food, with preference assessed as number of flies  
 175 caught in traps of two alternative flavours. It was adapted from [15,24], but implemented in a  
 176 natural setting in outdoor cages over two replicate days (August 30 and 31, 2016).

177 Flies were reared in standard laboratory (25°C, 12L:12D) conditions at controlled density  
 178 (approximately 200 eggs per bottle), and 3-day cohorts were sorted into groups of 50 by sex.

179 Flies were marked with fluorescent powder using four colours (Blue 1162B, Red 1162R, Yellow  
 180 1162Y and White 1162W; Bioquip, Rancho Dominguez, CA) according to learning treatment  
 181 and source population. A pinch of powder was added to an empty vial before adding the flies and  
 182 gently rolling the vial until the flies were coated. Flies were then transferred to a non-nutritional  
 183 agarose for 12 hours to recover from the marking process and to become starved, so they were  
 184 more motivated to feed. The flies were subsequently exposed to either strawberry or apple  
 185 flavoured food (two directions of conditioning) for an 8-hour training period, followed by a 4-  
 186 hour retention period on a fresh agar substrate, before being released into the outdoor cages for



## Rapid evolution of learning

testing. The use of four marking colours permitted the simultaneous release in the same cage of flies from the two genotypes being tested (either spring and fall or *cpo<sup>TTA</sup>* and *cpo<sup>CGT</sup>*) conditioned with either flavour (400 flies per conditioning direction, genotype season and sex). The cages ( $0.6 \times 0.6 \times 1.8$  m), made of mesh and with plant bedding covering the ground, were placed underneath a peach tree. Four pairs of strawberry and apple unidirectional traps were dispersed around the cage. Flies trapped in each trap within 14 hours after release were sexed and attributed to season and conditioning direction based on colouring. All of the trapped flies showed traces of the powder; thus, marking was effective, and no flies infiltrated the experiment from outside.

Learning performance was quantified as proportion of flies selecting traps flavoured with the same flavour that they had been previously exposed to during the conditioning. The same statistical analyses were performed as on the aversive conditioning, with year, ROP (season or *cpo* genotype), sex, and conditioning treatment are fixed effects and trap and day are random effects.

Natural populations:

$$\text{Proportion} = \text{Year} + \text{ROP} + \text{Sex} + \text{Conditioning treatment} + \text{Year:Conditioning treatment} + \text{Sex:Conditioning treatment} + \text{Trap} + \text{Day}$$

*cpo* genotypes:

$$\text{Proportion} = \text{ROP} + \text{Sex} + \text{Conditioning treatment} + \text{ROP:Sex} + \text{Trap} + \text{Day}$$

(e) *Fecundity*

Fecundity of the reconstructed seasonal populations was measured by placing 25 virgin females from each reconstructed seasonal population into culture bottles [40] with 25 males from a standardized stock (BDSC-3605). Food plates were changed daily for ten days to count the number of eggs and record any mortalities. Daily mean fecundity per female was calculated across 10 replicate bottles per population, taking into account any mortality that occurred. Therefore, population measurement of fecundity was assessed using mixed model ANOVAs, with the fixed effects of season and year (seasonal ROP) and genotype (*cpo* ROP).

Within-population relationship between learning and reproduction was assessed in the spring reconstructed seasonal populations from 2013 and 2014. Virgins were collected, aged in vials of standard food for 3 days, and subject to the aversive olfactory conditioning and test described above. The flies were thus divided in "learners" (those that chose CS-) and "non-learners" (those that chose CS+). From each replicate test, five "learner" and five "non-learner" females were placed onto food with 5 males from a tester stock; all available flies were used in the few replicates with fewer than five flies. The flies were housed on food supplemented with topical yeast to promote egg production before the assay and on grape-agar substrate during the egg collection. Daily fecundity was counted for 3 days post learning assessment and the mean fecundity per day per female was calculated based on the number of females in the vial. It was then compared between "learners" and "non-learners" from the same replicate test with a paired T-test.

### 3. Results

#### (a) Rapid evolution of learning and fecundity in a natural population

Learning ability in the wild *D. melanogaster* population evolved rapidly and repeatedly across seasonal time. The spring collections learned better than the fall from the same year when assessed using laboratory aversive conditioning ( $\chi^2_1 = 4.68$ ,  $p = 0.03$ ; Figure 1a, Table 1). These behavioural differences were not due to differences in ability to perceive the odorants, as there was no effect of season in absolute preference between odorant and solvent in unconditioned flies ( $\chi^2_1 = 0.03$ ,  $p = 0.85$  Figure 1b).

The spring collections also were better at learning an association between food and flavour tested in outdoor mesocosms. The spring flies were more likely than the fall flies to be trapped in traps flavoured with the same flavour as the food they previously encountered ( $\chi^2_1 = 5.6$ ,  $p = 0.017$ , Figure 1c).

The seasonal pattern of fecundity was opposite to that for learning ability. At the population level, the fall populations laid on average 30% more eggs per female per day than the spring populations (Figure 1d;  $F_{1,57} = 44.2$ ,  $p < 0.0001$ ). A phenotypic trade-off between learning and reproduction was also apparent at the individual level within the spring populations. Females within each population that chose the “wrong” odour (i.e., the odour associated with shock) in the aversive learning assay subsequently laid an average of six more eggs (25% more) per day compared to the females that made the “correct” choice, i.e., avoided the shock-associated odor ( $t_{14} = -2.84$ ,  $p = 0.013$ , Figure 1e).

#### (b) Natural variation in *cpo* sequence affects learning and fecundity

Recombinant outbred populations (ROPs) homozygous for the spring *cpo*<sup>TTA</sup> genotype

had higher aversive learning than the fall ROP; this pattern persisted across all retention intervals between conditioning and testing ( $\chi^2_1 = 27.12$ ,  $p = 1.91 \times 10^{-7}$ ; Figure 2a, Table 1). In the absence of conditioning, the spring ROPs showed a weaker avoidance of the odorants compared to the fall with 1-hour between shock exposure and the test ( $\chi^2_1 = 7.39$ ,  $p = 6.52 \times 10^{-3}$ , Figure 2b), but not at 5-minutes or 24-hour retention intervals. The *cpo* ROPs did not differ in the relative preference of naïve flies choosing between the odorants ( $\chi^2_1 = 1.11$ ,  $p = 0.29$ , Figure 2c), although there was an interaction between genotype and odorant ( $\chi^2_1 = 6.24$ ,  $p = 0.012$ ) with the spring ROP having a slight preference for MCH and the fall for OCT. However, replicate flies were conditioned in both directions to avoid either odour so this slight preference should not affect the quantification of learning ability. Thus, the difference in learning performance is not explainable by differences in odour perception. The spring ROPs also had a higher appetitive associative learning when assessed in the natural mesocosms ( $\chi^2_1 = 4.22$ ,  $p = 0.039$ , Figure 2a). The spring *cpo*<sup>TTA</sup> ROP was characterized by lower fecundity, with females laying 36% fewer eggs than females from the fall *cpo*<sup>CGT</sup> ROP (Figure 2d,  $F_2 = 8.23$ ,  $p = 0.01$ ).

## 4. Discussion

### (a) Rapid evolution in natural populations

Our data show that learning and fecundity both evolve rapidly in a natural population of *D. melanogaster* over the scale of approximately 10-15 generations from spring to fall and approximately 1-2 generations between fall and spring. The differences can be attributed to annual cyclical genetic changes because environmental effects are removed by rearing and testing these populations in common laboratory conditions. The repeatability across years indicates that this is not a result of genetic drift but instead of deterministic evolutionary

## Rapid evolution of learning

processes. Genomic data strongly suggest that gene flow through migration is not generating the observed seasonal cycles in allele frequency [45,46]. Therefore, the rapid and repeatable seasonal changes in learning and reproduction are more likely to reflect seasonally fluctuating selection. Learning is thus not only a mechanism of plasticity that allows organisms to respond rapidly to environmental change; we demonstrate that learning ability itself can evolve rapidly in nature.

The learning differences between spring and fall populations were consistently observed in a laboratory aversive conditioning assay and in an appetitive conditioning assay performed in outdoor mesocosms. In both assays, flies originating from the spring collections performed better than those from the fall. Learning associations between odours and both aversive and appetitive stimuli appear to be mediated by the same molecular mechanisms of synaptic plasticity in the mushroom body of the brain [47]. The memory of appetitive and aversive associations is formed at least partly in different subsets of mushroom body neurons, and acting on the appetitive and aversive memories involves different neurotransmitters [47]. Here, the similar pattern in learning performance in both assays implies that the evolutionary change affected a shared component of the learning process. This is consistent with an experimental evolution study in which *Drosophila* populations selected for appetitive learning also performed better in the aversive shock-odour assay [48].

The higher learning in the spring population is counter to the prediction that learning should improve during the summer when flies are active and perform many behaviours known to depend on learning. However, cognitive abilities may evolve to match the demands posed by an organism's biological and physical environment [49,50]. Energetically challenging environments (e.g., cold winters or severe droughts) are hypothesized to favour cognitive performance at the

cost of other physiological systems receiving less resources [51]. For example, cache seed recovery success in several bird species suggests that learning may be important for overwintering survival in harsh environments [52–54]. Although flies do not cache food, it is possible that learning is also important for other aspects of *D. melanogaster* overwintering survival in harsh climates, such as the ability to find a suitable overwintering site or temperature dependent patterns of foraging [55]. However, it is also possible that seasonal evolution of learning may be driven by selection on genetically correlated traits, such as fecundity.

#### *(b) Links between resilience, fecundity and learning*

We found that flies from fall collections show higher fecundity than those from the spring. The opposite trend has previously been reported in wild-caught females: higher fecundity during the first 24-hours after capture in flies collected in the spring compared to those collected in the fall [18]. However, many factors that change with season (e.g., age and nutrition) also affect fecundity; thus, the previously identified differences among wild-caught flies could have reflected these environmental effects rather than genetic differences. In the present study these environmental effects were excluded by rearing flies in a common garden, exposing for the first time a genetic component of seasonal changes in reproductive output. Fecundity is likely to be under strong selection during the summer months of rapid population expansion. Furthermore, previous studies have demonstrated that fly lines collected in the spring are more resilient than those from the fall, with higher propensity for reproductive dormancy [17], greater resistance to thermal stress [18], starvation [18] and bacterial pathogens [56]. The winter conditions are expected to favour such resilience traits, and at least some of these traits are known to trade-off with fecundity [57,58]. Altogether, these results support the hypothesis of alternating selection

for resilience required for survival in the harsh winter conditions and for reproduction during the summer expansion [59,60].

The seasonal changes learning performance could in principle have evolved for reasons unrelated to those driving the seasonal fluctuations in resilience and fecundity. However, in addition to the inverse relationship between learning performance and fecundity in spring versus fall populations, we found a negative phenotypic correlation between these traits at the individual level within populations. Females that made the "correct" odour choice in the aversive assay had lower fecundity than females from the same populations that made the "incorrect" choice (i.e., chose the odour previously associated with shock). The inverse relationship between learning and fecundity is consistent with previously reported trade-offs between these traits in a range of taxa [28,29,61]. The trade-off supports the hypothesis that the decline in learning performance from spring to fall in the natural *Drosophila* population is connected with selection for fecundity during the summer months. If so, the concerted annual evolutionary changes in learning performance, fecundity and resilience traits would be mediated by seasonal fluctuations in allele frequencies at loci with pleiotropic effects on all those traits.

### (c) Candidate polymorphism at *cpo*

Our results suggest *cpo* as one such pleiotropic candidate gene that mediates the annual seasonal evolutionary cycle. Variants of *cpo* show latitudinal clines and seasonal fluctuations in frequency [33,34,45,46,62,63] and affect many traits including activity, dormancy, fecundity and lifespan [33,35,37]. We show that genetic variants of *cpo* also affect learning performance: the ROP homozygous for the *cpo* genotype that is more frequent in the spring than in the fall and increases in frequency with latitude [35] performed better in the aversive learning assay than the

ROP homozygous for the alternative fall genotype. Furthermore the spring ROP had a lower fecundity than the fall ROP [35]. The *cpo* ROPs that represent annual frequency oscillations and latitudinal patterns of three loci in *cpo* are able to reconstruct the seasonal antagonistic effects on fecundity and learning performance that we observed in the wild-derived collections. This makes *cpo* a strong candidate to contribute to the cyclic annual evolution of these traits in the natural population of *D. melanogaster*.

Learning is a new phenotype associated with *cpo* even though the RNA-binding protein is known to be expressed in the mushroom bodies and *cpo* mutants have behaviour phenotypes [36,64]. *cpo* knockdown mutants have reduced odour avoidance [65], which we saw in flies carrying the spring *cpo* genotype that had weaker avoidance of odours when paired with air during the control. This leaves the possibility that the spring *cpo* genotype impairs perception of odours; however, this should have led to impaired rather than improved learning performance. Thus, the difference in learning between the genotypes is unlikely to be due to differences in olfaction, also confirmed by the odour response controls we report above. It is more plausible that the natural *cpo* genotypes we studied, or genetic variants linked to them, affect the neural processes of memory formation, storage and/or recall, although the mechanism by this RNA-binding protein acts on the function of neurons remain known.

#### (d) Pleiotropy as a driving force in evolution of learning

The discussion of learning evolution often assumes that inter- and intra-specific differences in learning performance are mainly driven by ecological factors that affect the benefits of learning, such as environmental predictability, reliability of cues, opportunities for learning and costs of making mistakes [1,50,66,67]. However, our study points out that natural



## Rapid evolution of learning

genetic variants that affect learning genes are likely to have broad pleiotropic effects. Similarly, a natural polymorphism in *D. melanogaster foraging (for)* gene is also pleiotropic: in addition to learning [68,69] it affects many traits, including foraging behaviour [70], aggregation [71] and competitive ability [69]. Highly pleiotropic effects of genes involved in learning also emerges from the study of mutant phenotypes [72,73]. The overall force of selection acting on such pleiotropic polymorphisms in natural populations reflects their aggregate impact on survival and reproduction mediated by the diverse ecologically relevant traits they influence. This makes it difficult to disentangle which traits are directly under selection for their fitness benefits and which mainly evolve as a by-product of natural selection on correlated traits. It is unclear in our results if changes in learning performance are driven by ecological factors that affect the usefulness of learning or if they evolve as a pleiotropic effect of selection acting on the focal polymorphisms for reasons unrelated to learning performance. Such pleiotropy may reflect alternative coadapted strategies or it may be a non-adaptive mechanistic consequence of gene action. Nonetheless, even if evolving mainly as correlated response to selection on other traits, the learning differences that we identify between our spring and fall populations and between the *cpo* genotypes may have ecologically relevant consequences for behaviour.

### Acknowledgements:

This work was supported by NSF GRF DGE-0822 (ELB), the Rosemary Grant Award from the Society for the Study of Evolution (ELB), the Teece Dissertation Research Fellowship from the University of Pennsylvania (ELB), the Peachey Environmental Fund from the Department of

## Rapid evolution of learning

393 Biology, University of Pennsylvania (ELB), and NIH R01GM100366 (PS), as well as research  
394 funding from the University of Lausanne to TJK.

395

### 396 **Author contributions:**

397 ELB, TJK and PS designed the experiment. ELB performed the experiment and did the analyses.

398 ELB, TJK and PS wrote the manuscript.

## References:

1. Dukas R. 2004 Evolutionary Biology of Animal Cognition. *Annu. Rev. Ecol. Evol. Syst.* **35**, 347–374. (doi:10.1146/annurev.ecolsys.35.112202.130152)
2. Paenke I, Sendhoff B, Kawecki TJ. 2007 Influence of Plasticity and Learning on Evolution under Directional Selection. *Am. Nat.* **170**, E47–E58. (doi:10.1086/518952)
3. Raine NE, Chittka L. 2008 The correlation of learning speed and natural foraging success in bumble-bees. *Proc. R. Soc. B Biol. Sci.* **275**, 803–808. (doi:10.1098/rspb.2007.1652)
4. Dawson EH, Chittka L. 2014 Bumblebees ( *Bombus terrestris* ) use social information as an indicator of safety in dangerous environments. *Proc. R. Soc. B Biol. Sci.* **281**, 20133174. (doi:10.1098/rspb.2013.3174)
5. Verzijden MN, ten Cate C, Servedio MR, Kozak GM, Boughman JW, Svensson EI. 2012 The impact of learning on sexual selection and speciation. *Trends Ecol. Evol.* **27**, 511–519. (doi:10.1016/J.TREE.2012.05.007)
6. Battesti M, Moreno C, Joly D, Mery F. 2012 Report Spread of Social Information and Dynamics of Social Transmission within Drosophila Groups. *Curr. Biol.* **22**, 309–313. (doi:10.1016/j.cub.2011.12.050)
7. Reichert MS, Quinn JL. 2017 Cognition in Contests: Mechanisms, Ecology, and Evolution. *Trends Ecol. Evol.* **32**, 773–785. (doi:10.1016/j.tree.2017.07.003)
8. Odling-Smee LC, Boughman JW, Braithwaite VA. 2008 Sympatric species of threespine stickleback differ in their performance in a spatial learning task. *Behav. Ecol. Sociobiol.* **62**, 1935–1945. (doi:10.1007/s00265-008-0625-1)
9. Hoedjes KM, Smid HM. 2014 Natural variation in long-term memory formation among Nasonia parasitic wasp species. *Behav. Processes* **105**, 40–45. (doi:10.1016/j.beproc.2014.02.014)
10. Froissart L, Giurfa M, Sauzet S, Desouhant E. 2017 Cognitive adaptation in asexual and sexual wasps living in contrasted environments. *PLoS One* **12**. (doi:10.1371/journal.pone.0177581)
11. Croston R, Branch CL, Kozlovsky DY, Roth TC, LaDage LD, Freas CA, Pravosudov V V. 2015

## Rapid evolution of learning

- 425 Potential mechanisms driving population variation in spatial memory and the hippocampus in  
426 food-caching chickadees. In *Integrative and Comparative Biology*, pp. 354–  
427 371.(doi:10.1093/icb/icv029)
- 428 12. Tryon RC. 1940 Studies in individual differences in maze ability. VII. The specific components of  
429 maze ability, and a general theory of psychological components. *J. Comp. Psychol.* **30**, 283–335.  
430 (doi:10.1037/h0054238)
- 431 13. Mcguire TR, Hirschth J. 1977 Behavior-genetic analysis of *Phormia regina*: conditioning, reliable  
432 individual differences and selection. *Proc. Natl. Acad. Sci.* **74**, 5193–5197.
- 433 14. Brandes C, Frish B, Menzel R. 1988 Time course of memory formation differs in honeybee lines  
434 selected for good and poor learning. *Anim. Behav.* **36**, 981–985.
- 435 15. Mery F, Kawecki TJ. 2002 Experimental evolution of learning ability in fruit flies. *Proc. Natl.*  
436 *Acad. Sci.* **99**, 14274–14279. (doi:10.1073/pnas.222371199)
- 437 16. Zwoinska MK, Maklakov AA, Kawecki TJ, Hollis B. 2017 Experimental evolution of slowed  
438 cognitive aging in *Drosophila melanogaster*. *Evolution* **71**, 662–670. (doi:10.1111/evo.13156)
- 439 17. Schmidt PS, Conde DR. 2006 Environmental heterogeneity and the maintenance of genetic  
440 variation for reproductive diapause in *Drosophila melanogaster*. *Evolution* **60**, 1602.  
441 (doi:10.1554/05-430.1)
- 442 18. Behrman EL, Watson SS, O’Brien KR, Heschel MS, Schmidt PS. 2015 Seasonal variation in life  
443 history traits in two *Drosophila* species. *J. Evol. Biol.* **28**, 1691–1704. (doi:10.1111/jeb.12690)
- 444 19. Behrman EL, Howick VM, Kapun M, Staubach F, Bergland AO, Petrov DA, Lazzaro BP, Schmidt  
445 PS. 2018 Rapid seasonal evolution in innate immunity of wild *Drosophila melanogaster*. *Proc. R.*  
446 *Soc. B Biol. Sci.* **285**. (doi:10.1098/rspb.2017.2599)
- 447 20. Dukas R. 1998 Evolutionary Ecology of Learning. In *Cognitive Ecology: The Evolutionary*  
448 *Ecology of Information Processing and Decision Making*, pp. 129–174.
- 449 21. Dukas R. 2005 Learning affects mate choice in female fruit flies. *Behav. Ecol.* **16**, 800–804.  
450 (doi:10.1093/beheco/ari057)

## Rapid evolution of learning

- 451 22. Sarin S, Dukas R. 2009 Social learning about egg-laying substrates in fruitflies. *Proc. R. Soc. B*  
452 *Biol. Sci.* **276**, 4323–4328. (doi:10.1098/rspb.2009.1294)
- 453 23. Battesti M, Moreno C, Joly D, Mery F. 2012 Spread of Social Information and Dynamics of Social  
454 Transmission within *Drosophila* Groups. *Curr. Biol.* **22**, 309–313.  
455 (doi:10.1016/j.cub.2011.12.050)
- 456 24. Zrelec V, Zini M, Guarino S, Mermoud J, Oppliger J, Valtat A, Zeender V, Kawecki TJ. 2013  
457 *Drosophila* rely on learning while foraging under semi-natural conditions. *Ecol. Evol.* **3**, 4139–  
458 4148. (doi:10.1002/ece3.783)
- 459 25. Hollis B, Kawecki TJ. 2014 Male cognitive performance declines in the absence of sexual  
460 selection. *Proc. R. Soc. B Biol. Sci.* **281**, 20132873. (doi:10.1098/rspb.2013.2873)
- 461 26. Laughlin SB, de Ruyter van Steveninck RR, Anderson JC. 1998 The metabolic cost of neural  
462 information. *Nat. Neurosci.* **1**, 36–41. (doi:10.1038/236)
- 463 27. Laughlin S. 2001 Energy as a constraint on the coding and processing of sensory information.  
464 *Curr. Opin. Neurobiol.* **11**, 475–480. (doi:10.1016/S0959-4388(00)00237-3)
- 465 28. Snell Rood EC, Davidowitz G, Papaj DR. 2011 Reproductive tradeoffs of learning in a butterfly.  
466 *Behav. Ecol.* **22**, 291–302. (doi:10.1093/beheco/arq169)
- 467 29. Mery F, Kawecki TJ. 2004 An operating cost of learning in *Drosophila melanogaster*. *Anim.*  
468 *Behav.* **68**, 589–598. (doi:10.1016/j.anbehav.2003.12.005)
- 469 30. Mery F, Kawecki TJ. 2005 Cost of Long-Term Memory in *Drosophila*. *Science* **308**, 1148.  
470 (doi:10.1126/science.1111331)
- 471 31. Mery F, Kawecki TJ. 2003 A fitness cost of learning ability in *Drosophila melanogaster*. *Proc. R.*  
472 *Soc. B Biol. Sci.* **270**, 2465–2469. (doi:10.1098/rspb.2003.2548)
- 473 32. Zhao X, Bergland AO, Behrman EL, Gregory BD, Petrov DA, Schmidt PS. 2015 Global  
474 Transcriptional Profiling of Diapause and Climatic Adaptation in *Drosophila melanogaster*. *Mol.*  
475 *Biol. Evol.* **33**, 707–720. (doi:10.1093/molbev/msv263)
- 476 33. Schmidt PS, Zhu C-T, Das J, Batavia M, Yang L, Eanes WF. 2008 An amino acid polymorphism

## Rapid evolution of learning

- 477 in the couch potato gene forms the basis for climatic adaptation in *Drosophila melanogaster*. *Proc.*  
478 *Natl. Acad. Sci.* **105**, 16207–16211. (doi:10.1073/pnas.0805485105)
- 479 34. Cogni R, Kuczynski C, Koury S, Lavington E, Behrman EL, O'Brien KR, Schmidt PS, Eanes WF.  
480 2013 The Intensity of Selection Acting on the Couch Potato Gene-Spatial-Temporal Variation in a  
481 Diapause Cline. *Evolution* **68**, 538–548. (doi:10.1111/evo.12291)
- 482 35. Behrman EL, Bergland AO, Petrov DA, Schmidt PS. 2020 Intragenic epistasis in couch potato and  
483 its effect on climatic adaptation in natural populations in *Drosophila melanogaster*. *BioRxiv*
- 484 36. Bellen HJ, Kooyer S, D'Evelyn D, Pearlman J. 1992 The *Drosophila* couch potato protein is  
485 expressed in nuclei of peripheral neuronal precursors and shows homology to RNA-binding  
486 proteins. *Genes Dev.* **6**, 2125–36.
- 487 37. Bellen HJ, Vaessin H, Bier E, Kolodkin A, D'Evelyn D, Kooyer S, Jant YN, Yuh Nung Jan. 1992  
488 The *Drosophila* couch potato gene: An essential gene required for normal adult behavior. *Genetics*  
489 **131**, 365–375.
- 490 38. Glasscock E, Tanouye MA. 2005 *Drosophila* couch potato Mutants Exhibit Complex Neurological  
491 Abnormalities Including Epilepsy Phenotypes. *Genetics* **169**, 2137–2149.  
492 (doi:10.1534/genetics.104.028357)
- 493 39. Celniker SE *et al.* 2009 Unlocking the secrets of the genome. *Nature* **459**, 927–930.  
494 (doi:10.1038/459927a)
- 495 40. Paaby AB, Bergland AO, Behrman EL, Schmidt PS. 2014 A highly pleiotropic amino acid  
496 polymorphism in the *Drosophila* insulin receptor contributes to life-history adaptation. *Evolution*  
497 **68**, 3395–3409. (doi:10.1111/evo.12546)
- 498 41. Mackay TFC *et al.* 2012 The *Drosophila melanogaster* Genetic Reference Panel. *Nature* **482**, 173–  
499 178. (doi:10.1038/nature10811)
- 500 42. Bates D, Mächler M, Bolker B, Walker S. 2014 Fitting Linear Mixed-Effects Models using lme4.  
501 *J. Stat. Softw.* **67**, 1–48. (doi:10.18637/jss.v067.i01)
- 502 43. Singmann H, Bolker B, Westfall J, Aust F. 2016 afex: Analysis of Factorial Experiments.

## Rapid evolution of learning

- 503 44. Fox J, Weisberg S. 2011 An {R} Companion to Applied Regression. See  
504 <http://socserv.socsci.mcmaster.ca/jfox/Books/Companion> (accessed on 18 December 2017).
- 505 45. Bergland AO, Behrman EL, O'Brien KR, Schmidt PS, Petrov DA. 2014 Genomic Evidence of  
506 Rapid and Stable Adaptive Oscillations over Seasonal Time Scales in *Drosophila*. *PLoS Genet.* **10**,  
507 e1004775. (doi:10.1371/journal.pgen.1004775)
- 508 46. Machado HE *et al.* 2019 Broad geographic sampling reveals predictable and pervasive seasonal  
509 adaptation in *Drosophila*. *bioRxiv*, 337543. (doi:10.1101/337543)
- 510 47. Cognigni P, Felsenberg J, Waddell S. 2018 Do the right thing: neural network mechanisms of  
511 memory formation, expression and update in *Drosophila*. *Curr. Opin. Neurobiol.*  
512 (doi:10.1016/j.conb.2017.12.002)
- 513 48. Mery F, Pont J, Preat T, Kawecki TJ. 2007 Experimental evolution of olfactory memory in  
514 *Drosophila melanogaster*. *Physiol. Biochem. Zool.* **80**, 399–405. (doi:10.1086/518014)
- 515 49. Healy SD, Jones CM. 2002 Animal learning and memory: an integration of cognition and ecology.  
516 *Zoology* **105**, 321–327. (doi:10.1078/0944-2006-00071)
- 517 50. Smid HM, Vet LEM. 2016 The complexity of learning, memory and neural processes in an  
518 evolutionary ecological context. *Curr. Opin. Insect Sci.* **15**, 61–69.  
519 (doi:10.1016/j.cois.2016.03.008)
- 520 51. Maille A, Schradin C. 2016 Ecophysiology of cognition: How do environmentally induced  
521 changes in physiology affect cognitive performance? *Biol. Rev.* **92**, 1101–1112.  
522 (doi:10.1111/brv.12270)
- 523 52. Olson DJ, Kamil AC, Balda RP, Nims PJ. 2004 Performance of Four Seed-Caching Corvid  
524 Species in Operant Tests of Nonspatial and Spatial Memory. *J. Comp. Psychol.* **109**, 1–9.
- 525 53. Bednekoff PA, Balda RP, Kamil AC, Hile AG. 1997 Long-term spatial memory in four seed-  
526 caching corvid species. *Anim. Behav.* **53**, 335–341. (doi:10.1006/anbe.1996.0395)
- 527 54. Pravosudov V V, Clayton NS. 2002 A test of the adaptive specialization hypothesis: Population  
528 differences in caching, memory, and the hippocampus in black-capped chickadees (*Parus*

## Rapid evolution of learning

- 529        atricapilla). *Behav. Neurosci.* **116**, 515–522. (doi:10.1037/0735-7044.116.4.515)
- 530    55.    Brankatschk M *et al.* 2018 A Temperature-Dependent Switch in Feeding Preference Improves
- 531        *Drosophila* Development and Survival in the Cold. *Dev. Cell* , 781–793.
- 532        (doi:10.1016/j.devcel.2018.05.028)
- 533    56.    Behrman EL, Howick VM, Kapun M, Staubach F, Bergland AO, Petrov DA, Lazzaro BP, Schmidt
- 534        PS. 2018 Rapid seasonal evolution in innate immunity of wild *Drosophila melanogaster*. *Proc. R.*
- 535        *Soc. B Biol. Sci.* **285**. (doi:10.1098/rspb.2017.2599)
- 536    57.    Stearns SC. 1992 The Evolution of Life Histories. *Oxford Univ. Press. London* **6**, 304–306.
- 537        (doi:10.1046/j.1420-9101.1993.6020304.x)
- 538    58.    Roff DA. 2002 *Life history evolution*. Sinauer Associates.
- 539    59.    Schmidt PS, Paaby AB, Heschel MS. 2005 Genetic variance for diapause expression and
- 540        associated life histories in *Drosophila melanogaster*. *Evolution* **59**, 2616–2625.
- 541        (doi:10.1111/j.0014-3820.2005.tb00974.x)
- 542    60.    Schmidt PS, Paaby AB. 2008 Reproductive diapause and life-history clines in North American
- 543        populations of *Drosophila melanogaster*. *Evolution* **62**, 1204–1215. (doi:10.1111/j.1558-
- 544        5646.2008.00351.x)
- 545    61.    Galea LAM, Kavaliers M, Ossenkopp KP, Innes D, Hargreaves EL. 1994 Sexually dimorphic
- 546        spatial learning varies seasonally in two populations of deer mice. *Brain Res.* **635**, 18–26.
- 547        (doi:10.1016/0006-8993(94)91419-2)
- 548    62.    Fabian D, Kapun M, Nolte V, Kofler R, Schmidt PS, Schlötterer C, Flatt T. 2012 Genome-wide
- 549        patterns of latitudinal differentiation among populations of *Drosophila melanogaster* from North
- 550        America. *Mol. Ecol.* **21**, 4748–4769. (doi:10.1111/j.1365-294X.2012.05731.x)
- 551    63.    Kolaczowski B, Kern AD, Holloway AK, Begun DJ. 2011 Genomic Differentiation Between
- 552        Temperate and Tropical Australian Populations of *Drosophila melanogaster*. *Genetics* **187**, 245–
- 553        260. (doi:10.1534/genetics.110.123059)
- 554    64.    Bellen HJ, Vaessin? H, Bier E, Kolodkin A, D’elyyn D, Kooyer S, Jant YN. 1992 The



## Rapid evolution of learning

- 555 Drosophila couch potato Gene: An Essential Gene Required for Normal Adult Behavior.
- 556 65. Sambandan D, Yamamoto A, Fanara J-J, Mackay TFC, Anholt RRH. 2006 Dynamic genetic  
557 interactions determine odor-guided behavior in *Drosophila melanogaster*. *Genetics* **174**, 1349–63.  
558 (doi:10.1534/genetics.106.060574)
- 559 66. Johnston TD. 1982 Selective costs and benefits in the evolution of learning. *Adv. Study Behav.* **12**,  
560 65–106.
- 561 67. Dunlap AS, Stephens DW. 2016 Reliability, uncertainty, and costs in the evolution of animal  
562 learning. *Curr. Opin. Behav. Sci.* **12**, 73–79. (doi:10.1016/J.COBEHA.2016.09.010)
- 563 68. Mery F, Belay AT, K-C So A, Sokolowski MB, Kawecki TJ, Robinson GE, So AKC. 2007  
564 Natural polymorphism affecting learning and memory in *Drosophila*. *Proc. Natl. Acad. Sci.* **104**,  
565 13051–13055. (doi:10.1073/pnas.0702923104)
- 566 69. Kaun KR, Hendel T, Gerber B, Sokolowski MB. 2007 Natural variation in *Drosophila* larval  
567 reward learning and memory due to a cGMP-dependent protein kinase. *Learn. Mem.* **14**, 342–349.  
568 (doi:10.1101/lm.505807)
- 569 70. Fitzpatrick MJ, Sokolowski MB. 2004 In Search of Food: Exploring the Evolutionary Link  
570 Between cGMP-Dependent Protein Kinase (PKG) and Behaviour. *Integr. Comp. Biol.* **44**, 28–36.  
571 (doi:10.1093/icb/44.1.28)
- 572 71. Wang S, Sokolowski MB. 2017 Aggressive behaviours, food deprivation and the foraging gene. *R.*  
573 *Soc. Open Sci.* **4**, 170042. (doi:10.1098/rsos.170042)
- 574 72. Dubnau J, Chiang A-S, Tully T. 2002 Neural substrates of memory: From synapse to system. *J.*  
575 *Neurobiol.* **54**, 238–253. (doi:10.1002/neu.10170)
- 576 73. Butcher LM, Kennedy JK, Plomin R. 2006 Generalist genes and cognitive neuroscience. *Curr.*  
577 *Opin. Neurobiol.* **16**, 145–151. (doi:10.1016/j.conb.2006.03.004)
- 578

# Rapid evolution of learning

579

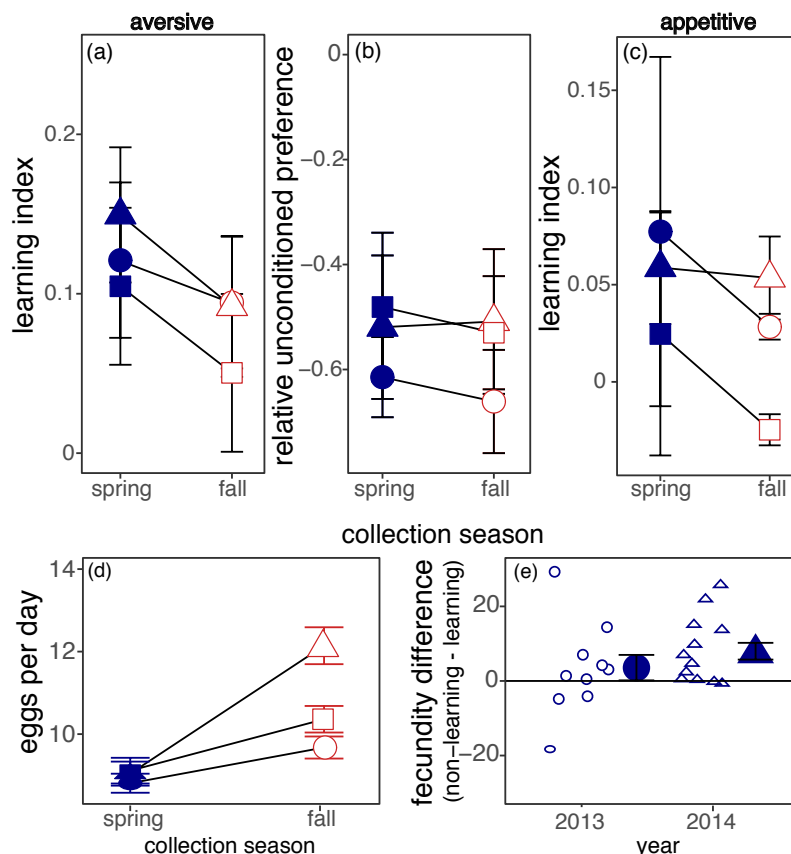

580

581 Figure 1. Rapid evolution of learning and reproduction in natural populations of *Drosophila*  
582 *melanogaster*. (a) Higher learning (mean  $\pm$  S.E) in the spring populations compared to the fall  
583 replicated across three years: 2012 (square), 2013 (circle), 2014 (triangle). (b) No difference in  
584 absolute preference in either population when unconditioned flies are given the choice between  
585 one odour and solvent. (c) Spring populations return to positive conditioning food at a higher rate  
586 than fall populations. (d) Fewer eggs laid per day in the spring populations compared to the fall  
587 averaged over ten days. (e) Individuals that do not learn in the aversive conditioning assay have  
588 higher daily reproductive output over three days than those that learn. Difference between  
589 individuals is shown in small outlined shapes and the mean difference  $\pm$  SE in the large, filled  
590 shapes.

# Rapid evolution of learning

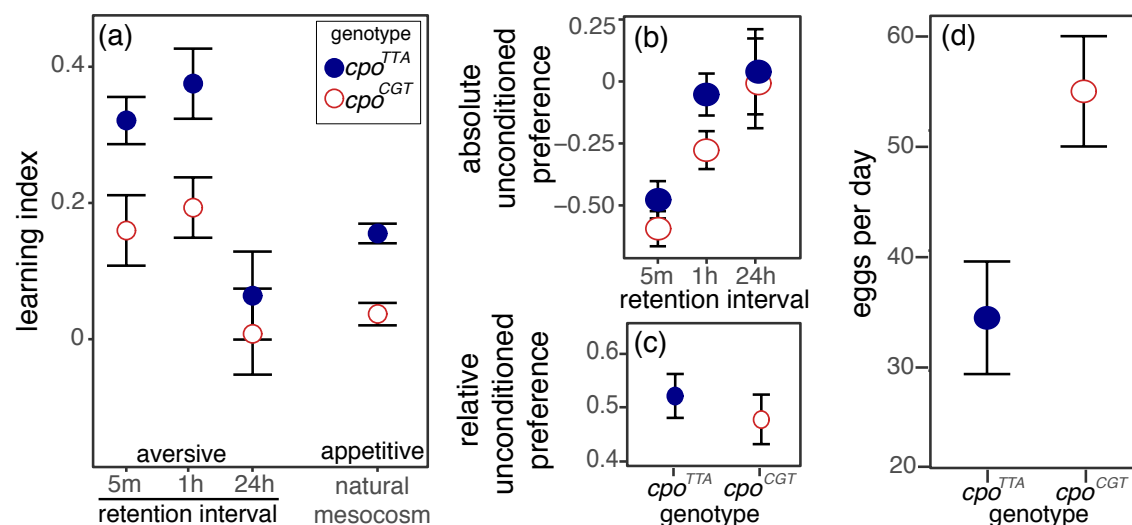

Figure 2. Natural variants in *couch potato* (*cpo*) involved in trade-off between learning and reproduction. (a) Flies containing the spring (*cpo*<sup>TTA</sup>) genotype show better learning than flies that contain the fall (*cpo*<sup>CGT</sup>) genotype, across all retention intervals between conditioning and test in the aversive shock assay, as well as in the appetitive conditioning of the natural mesocism. (b) Unconditioned flies containing the spring genotype have a slightly higher absolute preference for odour instead of solvent compared to the flies containing the fall genotype. (c) However, there is no difference in relative preference for either of the experimental odours in unconditioned flies. (d) Flies containing the fall *cpo* genotype had higher daily reproductive output than flies containing the spring *cpo* genotype. In all panels the symbols are mean  $\pm$  SE.

## Rapid evolution of learning

### Supplemental Material

Table 1. Analysis of Deviance (Likelihood ratio test)

|                             | Aversive learning |        |     | Absolute unconditioned preference |       |     | Relative unconditioned preference |       |   | Appetitive learning |        |       |
|-----------------------------|-------------------|--------|-----|-----------------------------------|-------|-----|-----------------------------------|-------|---|---------------------|--------|-------|
|                             | df                | Chisq  | p   | df                                | Chisq | p   | df                                | Chisq | p | df                  | Chisq  | p     |
| <b>Seasonal populations</b> |                   |        |     |                                   |       |     |                                   |       |   |                     |        |       |
| Year                        | 2                 | 0.078  |     | 2                                 | 8.56  |     |                                   |       |   | 2                   | 14.25  | ***   |
| Season                      | 1                 | 4.68   | *   | 1                                 | 0.24  |     |                                   |       |   | 1                   | 5.6    | *     |
| Sex                         | 1                 | 0.0013 |     | 1                                 | 0.072 |     |                                   |       |   | 1                   | 13.02  | ***   |
| Odor                        | 1                 | 42.41  | *** | 1                                 | 1.91  | *** |                                   |       |   | 1                   | 1391.7 | ***   |
| Year:Odor                   | 2                 | 12.75  | **  | 2                                 | 1.99  |     |                                   |       |   | 2                   | 23.05  | ***   |
| Sex:Odor                    | 1                 | 4.36   | *   | 1                                 | 4.96  |     |                                   |       |   | 1                   | 15.61  | ***   |
| <b><i>cpo</i> genotypes</b> |                   |        |     |                                   |       |     |                                   |       |   |                     |        |       |
| Genotype                    | 1                 | 27.12  | *** | 1                                 | 7.39  | **  | 1                                 | 1.19  |   | 1                   | 4.22   | *     |
| Sex                         | 1                 | 6.87   | **  | 1                                 | 0.24  |     | 1                                 | 0.059 |   | 1                   | 0.85   |       |
| Odor                        | 1                 | 166.99 | *** | 1                                 | 12.18 | *** | 1                                 | 1.18  |   | 1                   | 454.23 | ***   |
| Recovery Time               | 1                 | 54.13  | *** | 1                                 | 66.56 | *** |                                   |       |   |                     |        |       |
| Genotype:Odor               | 1                 | 10.41  | **  | 1                                 | 6.94  | **  | 1                                 | 6.24  | * |                     |        |       |
| Genotype:Time               | 1                 | 4.62   |     | 1                                 | 53.41 | *** |                                   |       |   |                     |        |       |
| Genotype:Sex                |                   |        |     |                                   |       |     |                                   |       |   | 1                   | 2.98   | 0.084 |

Significance codes: \* < 0.05, \*\* < 0.01, \*\*\* < 0.001
